# Supplementary material for: Implementation of Antibiotic Discovery by Student Crowdsourcing in the Valencian Community Through a Service Learning Strategy
Source: Front Microbiol. 2020 Nov 16;11:564030. doi: 10.3389/fmicb.2020.564030 (PMC7702300; doi:10.3389/fmicb.2020.564030)
Supplement: Supplementary file 1 [file Data_Sheet_1.xlsx]

## Sheet: Sheet1
	Supplementary data
	POST-SURVEY FOR MMTAs. QUESTIONS AND RESULTS														Percentages
	Scientific interest	1	2	3	4	5	Number of answers	average		Sum % 3,4,5	Sum % 4 & 5	Number of answers	1	2	3	4	5
	Your interest in research has increased due to participation in this project	0	3	28	57	52	140	4.12857		97.8571	77.8571	140	0	2.14286	20	40.7143	37.1429	100
	This experience got you closer to a real problem	1	3	9	35	92	140	4.52857		97.1429	90.7143	140	0.714286	2.14286	6.42857	25	65.7143	100
	The results obtained could contribute to scientific progress	0	7	24	56	53	140	4.10714		95	77.8571	140	0	5	17.1429	40	37.8571	100
	This project has allowed to know the microbial diversity in the environment	1	6	18	59	56	140	4.16429		95	82.1429	140	0.714286	4.28571	12.8571	42.1429	40	100
	Antibiotic resistance
	The project contributed to understand better antibiotic bacterial resistance	0	0	2	38	100	140	4.7		100	98.5714	140	0	0	1.42857	27.1429	71.4286	100
	Your understanding about antibiotics use has changed through this experience	6	4	16	32	78	136	4.26471		92.6471	80.8824	136	4.41176	2.94118	11.7647	23.5294	57.3529	100
	Work in the schools
	Theoretical explanations were understandable for the students	0	1	13	46	80	140	4.46429		99.2857	90	140	0	0.714286	9.28571	32.8571	57.1429	100
	Explanations about practical procedures were understandable for students	0	0	12	38	90	140	4.55714		100	91.4286	140	0	0	8.57143	27.1429	64.2857	100
	You were able to give an answer to unplanned situations	0	0	13	46	81	140	4.48571		100	90.7143	140	0	0	9.28571	32.8571	57.8571	100
	You were able to answer students' questions during practical development	0	1	5	38	96	140	4.63571		99.2857	95.7143	140	0	0.714286	3.57143	27.1429	68.5714	100
	Others
	This project has contributed to improve your scientific training	2	3	6	38	90	139	4.51799		96.4029	92.0863	139	1.43885	2.15827	4.31655	27.3381	64.7482	100
	Your implication in this project has improved some transversal skills	0	3	7	43	86	139	4.52518		97.8417	92.8058	139	0	2.15827	5.03597	30.9353	61.8705	100
	Assess your global experience working with this problem	0	0	11	61	66	138	4.39855		100	92.029	138	0	0	7.97101	44.2029	47.8261	100
	Would you recommend to other students collaborate in this project?	1	1	5	36	96	139	4.61871		98.5612	94.964	139	0.719424	0.719424	3.59712	25.8993	69.0647	100
	Reflect your global opinion about this project	1	1	6	59	62	129	4.39535		98.4496	93.7984	129	0.775194	0.775194	4.65116	45.7364	48.062	100
	POST-SURVEY FOR SWIs. QUESTIONS AND RESULTS
															Percentages
	Scientific intereset	1	2	3	4	5	Number of answers	average		Sum % 3,4,5	Sum % 4 & 5	Number of answers	1	2	3	4	5
	Participation in this project has sparked your interest or curiosity in science	8	18	85	308	209	628	4.07419		95.8599	82.3248	628	1.27389	2.86624	13.535	49.0446	33.2803	100
	This experience has brought you closer to a problem of interest	7	24	108	208	210	557	4.05431		94.4345	75.0449	557	1.25673	4.3088	19.3896	37.3429	37.702	100
	Your results can contribute to scientific progress	60	77	168	130	124	559	3.2503		75.4919	45.4383	559	10.7335	13.7746	30.0537	23.2558	22.1825	100
	Importance of the experiment and microbial diversity in the environment	5	21	151	203	171	551	3.92243		95.2813	67.8766	551	0.907441	3.81125	27.4047	36.8421	31.0345	100
	Antibiotic resistance
	Now you understand better the problem of antibiotic resistance	16	32	83	200	232	563	4.06177		91.4742	76.7318	563	2.84192	5.68384	14.7425	35.524	41.2078	100
	This experience has changed your perception of the use of antibiotics	11	16	72	177	283	559	4.28706		95.1699	82.2898	559	1.9678	2.86225	12.8801	31.6637	50.6261	100
	Others
	This project has improved your scientific training	1	26	118	211	208	564	4.03497		95.2128	74.2908	564	0.177305	4.60993	20.922	37.4113	36.8794	100
	Would you recommend to other colleagues or centers participate in this project?	0	2	31	102	424	559	4.66863		99.6422	94.0966	559	0	0.357782	5.54562	18.2469	75.8497	100
	Reflect your global opinion on participation in this project	0	4	61	223	246	534	4.31266		99.2509	87.8277	534	0	0.749064	11.4232	41.7603	46.0674	100
	POST-SURVEY FOR PRIMARY STUDENTS. QUESTIONS AND RESULTS														Percentages
	Learning	1	2	3	4	5	Number of answers	average		Sum % 3,4,5	Sum % 4 & 5	Number of answers	1	2	3	4	5
	I understood why taking antibiotics when I shouldn't could be dangerous	0	0	0	2	40	42	4.95238		100	100	42	0	0	0	4.7619	95.2381	100
	I learnt new things about bacteria and antibiotics	0	0	1	11	30	42	4.69048		100	97.619	42	0	0	2.38095	26.1905	71.4286	100
	Now I think I know more things than I knew before participating in the project	0	0	2	11	29	42	4.64286		100	95.2381	42	0	0	4.7619	26.1905	69.0476	100
												42
	Interest
	Activities were entertaining and interesting	0	1	1	6	34	42	4.7381		97.619	95.2381	42	0	2.38095	2.38095	14.2857	80.9524	100
	This project made me more interested in science	0	1	7	16	18	42	4.36538		97.619	80.9524	42	0	2.38095	16.6667	38.0952	42.8571	100
	Instructors
	Instructors did a good job	1	0	0	1	40	42	4.88095		97.619	97.619	42	2.38095	0	0	2.38095	95.2381	100
